# Supplementary material for: Nanoplastic-Induced Nanostructural, Nanomechanical, and Antioxidant Response of Marine Diatom Cylindrotheca closterium
Source: MDPI journal article supplement (doi:10.3390/w14142163), 2022-07-08
Supplement: s1 [file s1]

## Supplementary Material for:

# Nanoplastic-Induced Nanostructural, Nanomechanical, and Antioxidant Response of Marine Diatom *Cylindrotheca closterium*

Tea Mišić Radić <sup>1,\*</sup>, Petra Vukosav <sup>1</sup>, Bruno Komazec <sup>2</sup>, Cécile Formosa-Dague <sup>3</sup>, Darija Domazet Jurašin <sup>1</sup>,

Petra Peharec Štefanić <sup>2</sup>, Andrea Čačković <sup>1</sup>, Krunoslav Juraić <sup>1</sup> and Nadica Ivošević DeNardis <sup>1</sup>

<sup>1</sup> Ruđer Bošković Institute, Bijenička 54, 10000 Zagreb, Croatia; petra.vukosav@irb.hr (P.V.); djurasin@irb.hr (D.D.J.); acackov@irb.hr (A.Č.); kjuraic@irb.hr (K.J.); ivosevic@irb.hr (N.I.D.)

<sup>2</sup> Department of Biology, Faculty of Science, University of Zagreb, Horvatovac 102a, 10000 Zagreb, Croatia; bruno.komazec@biol.pmf.hr (B.K.); petra.peharec.stefanic@biol.pmf.hr (P.P.Š.)

<sup>3</sup> Toulouse Biotechnology Institute, Université de Toulouse, Institut National des Sciences Appliquées, Institut National de la Recherche Agronomique et Environnementale, Centre National de la Recherche Scientifique, 31400 Toulouse, France; formosa@insa-toulouse.fr

\* Correspondence: tmisic@irb.hr

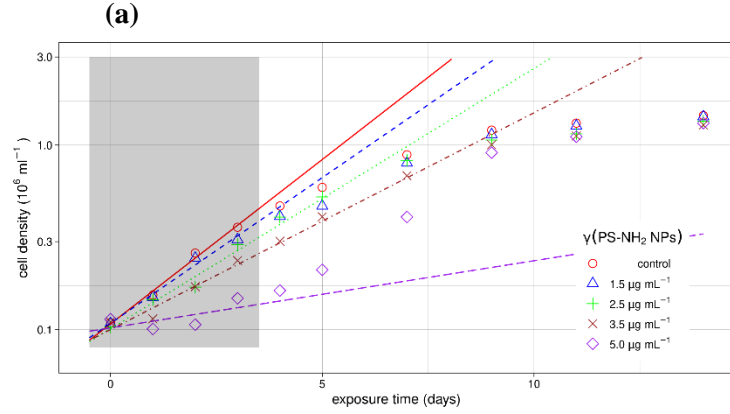

| $\gamma$ (NP) / $\mu\text{g mL}^{-1}$ | $N_0$ (f) $\pm$ SD ( $\times 10^6$ ) | $\mu$ (f) $\pm$ SD |
|---------------------------------------|--------------------------------------|--------------------|
| 0                                     | $0.071 \pm 0.005$                    | $0.41 \pm 0.03$    |
| 1.5                                   | $0.075 \pm 0.007$                    | $0.36 \pm 0.03^*$  |
| 2.5                                   | $0.07 \pm 0.01$                      | $0.33 \pm 0.05^*$  |
| 3.5                                   | $0.08 \pm 0.01$                      | $0.27 \pm 0.06^*$  |
| 5.0                                   | $0.09 \pm 0.02$                      | $0.08 \pm 0.07^*$  |

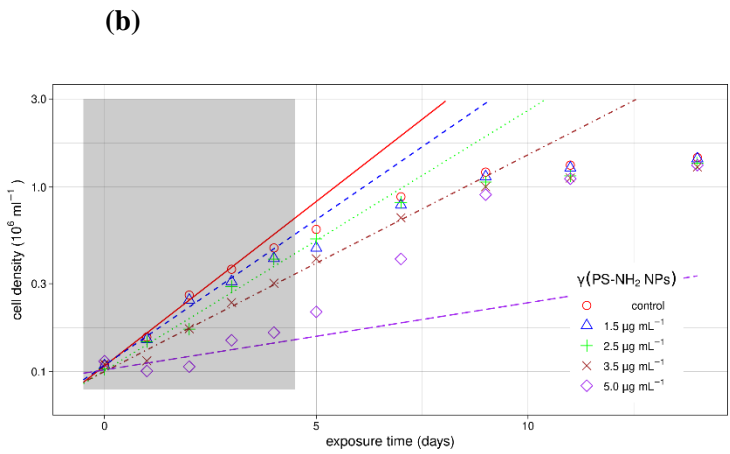

| $\gamma$ (NP) / $\mu\text{g mL}^{-1}$ | $N_0$ (f) $\pm$ SD ( $\times 10^6$ ) | $\mu$ (f) $\pm$ SD |
|---------------------------------------|--------------------------------------|--------------------|
| 0                                     | $0.076 \pm 0.006$                    | $0.38 \pm 0.03$    |
| 1.5                                   | $0.079 \pm 0.007$                    | $0.34 \pm 0.02$    |
| 2.5                                   | $0.071 \pm 0.007$                    | $0.34 \pm 0.02$    |
| 3.5                                   | $0.076 \pm 0.008$                    | $0.27 \pm 0.03^*$  |
| 5.0                                   | $0.01 \pm 0.01$                      | $0.11 \pm 0.04^*$  |

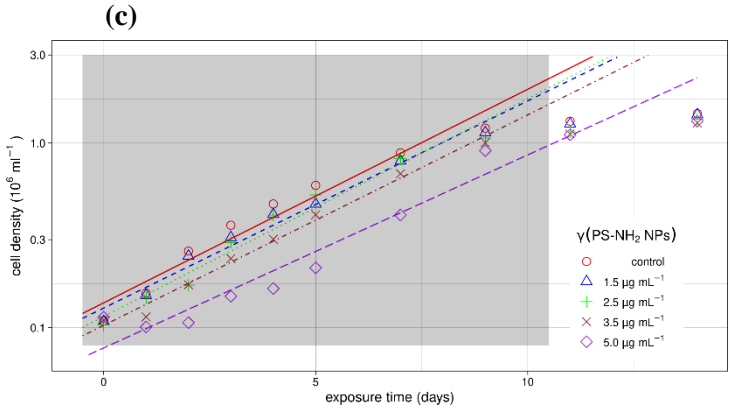

| $\gamma$ (NP) / $\mu\text{g mL}^{-1}$ | $N_0$ (f) $\pm$ SD ( $\times 10^6$ ) | $\mu$ (f) $\pm$ SD |
|---------------------------------------|--------------------------------------|--------------------|
| 0                                     | $0.11 \pm 0.01$                      | $0.27 \pm 0.02$    |
| 1.5                                   | $0.099 \pm 0.009$                    | $0.26 \pm 0.02$    |
| 2.5                                   | $0.09 \pm 0.01$                      | $0.27 \pm 0.02$    |
| 3.5                                   | $0.079 \pm 0.005$                    | $0.26 \pm 0.01$    |
| 5.0                                   | $0.06 \pm 0.01$                      | $0.24 \pm 0.03$    |

**Figure S1.** Results of fit to the exponential function (Eq. 3) of growth curves of *C. closterium* exposed to different PS-NH<sub>2</sub> nanoparticle concentrations in the different parts of exponential growth phase marked by grey rectangles (a) first 3 days (D3) (b) first 4 days (D4) and (c) first 9 days (D9) (\* statistically significant difference)

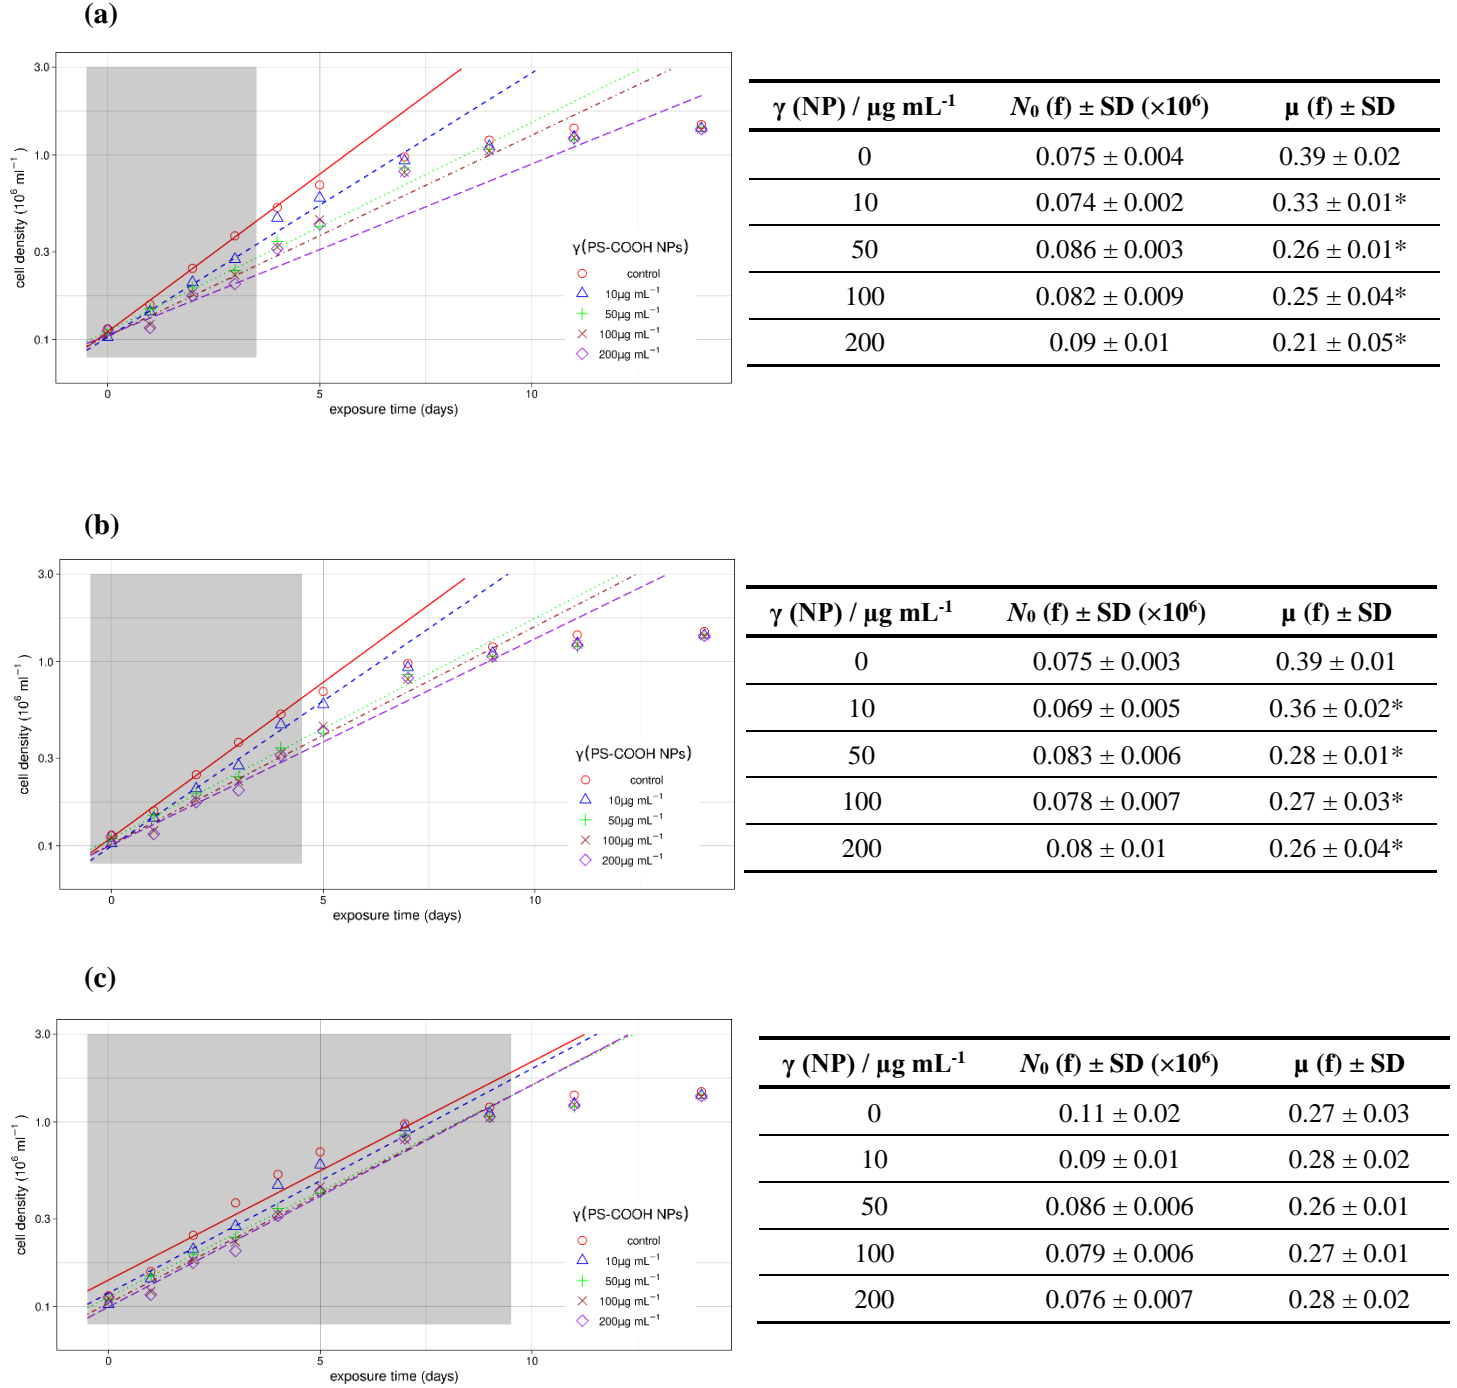

**Figure S2.** Results of fit to the exponential function (Eq. 3) of growth curves of *C. closterium* exposed to different PS-COOH nanoparticle concentrations in the different parts of exponential growth phase marked by red rectangles (rectangles (a) first 3 days (D3) (b) first 4 days (D4) and (c) first 9 days (D9) (\* statistically significant difference).

**Table S1.** Physicochemical characterization of PS-NH<sub>2</sub> and PS-COOH nanoplastics (50 µg mL<sup>-1</sup>) in ultrapure water (UPW) and filtered natural seawater (FSW) by dynamic (DLS) and electrophoretic light scattering (ELS) and atomic force microscopy (AFM).

| Nanoplastics       | Time / h | Zeta potential (ζ) / mV |             | Particle hydrodynamic diameter ( <i>d<sub>h</sub></i> ) as measured by DLS / nm (vol. %) |                                                   | Particle height as measured by AFM / nm |                                      |
|--------------------|----------|-------------------------|-------------|------------------------------------------------------------------------------------------|---------------------------------------------------|-----------------------------------------|--------------------------------------|
|                    |          | UPW                     | FSW         | UPW                                                                                      | FSW                                               | UPW                                     | FSW                                  |
| PS-NH <sub>2</sub> | 0        | 52.5 ± 1.4              | 15.1 ± 2.2  | 48.5 ± 0.4                                                                               | 55.4 ± 1.1                                        | 47.9 ± 6.2                              | 55.4 ± 1.1                           |
|                    | 24       | 47.7 ± 1.3              | 9.1 ± 0.9   | 49.1 ± 0.6                                                                               | 91.3 ± 5.1 (98%)<br>4892.2 ± 167.0 (2%)           | *                                       | 51.7 ± 6.5**                         |
| PS-COOH            | 0        | -44.2 ± 3.1             | -12.3 ± 1.6 | 54.5 ± 0.4                                                                               | 1282.0 ± 59.7 (83.6 %)<br>4967.5 ± 813.1 (15.8 %) | 51.8 ± 10.6                             | 100 - 200***<br>900-1500 (width)     |
|                    | 24       | -45.7 ± 5.2             | -8.3 ± 1.0  | 55.8 ± 1.2                                                                               | 2554.3 ± 576.0 (13.6%)<br>5102.6 ± 296.9 (86.4)   | *                                       | 100 - 350 nm***<br>3500-5200 (width) |

\*not measured; \*\*smooth layer around some particles; \*\*\*aggregates

**Table S2.** Average Young modulus values obtained for *Cylindrotheca closterium* (5 cells) in the three different conditions tested in this study (control condition, exposure to 5  $\mu\text{g mL}^{-1}$  PS-NH<sub>2</sub> and to 200  $\mu\text{g mL}^{-1}$  PS-COOH). Results are given in kPa.

| <b>Cell</b>   | <b>Control condition</b> | <b>Exposure to PS-NH<sub>2</sub></b> | <b>Exposure to PS-COOH</b> |
|---------------|--------------------------|--------------------------------------|----------------------------|
| <b>Cell 1</b> | 1039.7 $\pm$ 167.4       | 675.9 $\pm$ 192.5                    | 1112.5 $\pm$ 157.6         |
| <b>Cell 2</b> | 988.6 $\pm$ 304.0        | 1354.0 $\pm$ 150.6                   | 883.6 $\pm$ 283.4          |
| <b>Cell 3</b> | 1818.0 $\pm$ 573.8       | 540.0 $\pm$ 307.1                    | 518.5 $\pm$ 140.8          |
| <b>Cell 4</b> | 1195.8 $\pm$ 612.8       | 1135.1 $\pm$ 171.0                   | 715.4 $\pm$ 324.4          |
| <b>Cell 5</b> | 698.8 $\pm$ 231.8        | 1468.9 $\pm$ 778.7                   | 501.5 $\pm$ 85.3           |
